# Supplementary material
Source: Research Square preprint supplement (doi:10.21203/rs.3.rs-9587397/v1)
Supplement: Supplementary file 1 [file f2ce006bbf1d85dc59296e0a.docx]

# SUPPLEMENTARY METHODS

# S1. Study 1: US Pilot Administration Crossover

## Study identification and design

Study 1 was titled “A pilot comparative study of Apoquel® Chewable (chewable oclacitinib formulation) vs. Apoquel® Film-Coated tablets: Impact on owner compliance in dogs.” The sponsor was Zoetis, and the report lists a study period of January 2024 through July 2024. The report describes Study 1 as a single-center, cross-sectional, comparative pilot study led by a single general practitioner veterinarian.

## Participants and crossover structure

Eleven dog owners whose dogs were to be prescribed oclacitinib twice daily for control of allergic pruritus and dermatitis were recruited. Owners were informed about the purpose and procedures of the study and provided informed consent before participation. Patients were randomly assigned to receive either the film-coated tablet (FCT) or the chewable formulation first for five consecutive days and then crossed over to the alternate formulation for the subsequent five days; both formulations were administered twice daily. The report does not describe a washout period between the two 5-day treatment phases.

## Owner administration procedures

Participants administered each formulation according to their regular dosing schedule. The report states that owners were free to use administration methods appropriate for their dog and based on their usual approach. Examples given in the report include offering the tablets freely in an empty food bowl, offering them by hand, placing them directly in the dog’s mouth, or hiding the tablet in food.

In addition to administration, owners were asked to record the entire process on their phone video from start to finish and to note the time required for administration. During each 5-day formulation period, owners were asked to note any difficulties or challenges encountered during tablet administration.

## Assessments and data collection

Assessments were collected at the completion of each formulation period through Qualtrics™. The report explicitly lists the following assessment domains:

- Ease of administration, including owner rating of how easy or difficult administration was and any specific challenges encountered.
- Methods tried, including offering in a food bowl, by hand, directly in the mouth, or hidden in food.
- Success rate of the first try for each method used.
- Dog acceptance, based on whether the dog readily accepted the tablet or showed resistance.
- Additional methods or interventions used when owners found that a formulation required extra activities or tricks to ensure ingestion.
- Owner preference for one formulation over the other based on ease of administration and the dog’s acceptance.

The report further states that qualitative data were collected as open-ended responses about ease of administration, acceptance by the dog, any difficulties encountered, and overall satisfaction. Quantitative questionnaire data included administration time, willingness of dogs to accept the tablet, and observed difficulties during administration. Photo or video footage of administration was uploaded through Qualtrics™; the report specifies requested footage at initial administration on Day 1, at Day 3, and again at Days 6 and 8 of the opposite treatment.

## Analysis

Qualitative data, including direct quotes from owners and the veterinary practice, were summarized using thematic analysis to identify patterns and themes. Quantitative data were summarized but not statistically analyzed, and arithmetic means were reported in the study report.

# S2. Study 2: Italian Owner-Experience and Preference Survey

## Study identification and design

Study 2 was titled “Dog owners’ preference for chewable versus conventional (film-coated) Apoquel®.” The sponsor was Zoetis, and the report lists a study period from 15 January 2021 through 1 September 2022. The report describes a web-based online survey conducted in Italy using Qualtrics, with two sequential stages: Stage 1 after administration of Apoquel film-coated tablets and Stage 2 after administration of Apoquel chewable during a future course of prescribed therapy.

## Sample and setting

The report states that at least 15 dog owners who were already administering Apoquel completed both surveys. It further states that the survey was not intended to represent the larger population of dog owners currently administering Apoquel, but rather to explore owner experiences with the film-coated and chewable formulations. The chewable formulation became commercially available in Italy at the end of June 2022 and was prescribed by the attending veterinarians.

## Owner instructions

The report provides explicit owner instructions for administration and observation:

- Dogs were to be observed for up to 3 minutes after offering the film-coated or chewable formulation.
- For the film-coated formulation, owners were instructed first to offer the tablet in an empty food bowl for 3 minutes and then in the hand for 3 minutes.
- For the chewable formulation, owners were instructed first to offer the product in an empty food bowl for 3 minutes and then in the hand for 5 minutes.
- If the dog did not take the formulation from the empty bowl or from the hand, the owner was to administer it using the normal delivery method.
- Owners were to take photo and video recordings of administration; the report states that a total of four images or videos were taken chronicling administration of both formulations.
- All participants received Apoquel chewable sample worth up to 2 weeks’ supply after the second survey, and additional samples could be prescribed as a token of thanks.

## Survey structure and items

The report provides the Stage 1 and Stage 2 survey structure and item domains.

### Stage 1: survey after administering Apoquel film-coated

- Consent form upload.
- Demographics: veterinarian, practice name, owner last name, dog name, age, breed, sex, and weight (kg).
- Current administration method or methods for film-coated tablets: empty food bowl, in hand, with food in a bowl, wrapped or coated with appetizing food, or other method.
- Owner free-text description of how willingly the dog accepted the medication.
- Question on whether administering the tableted medication in this way was an enjoyable experience for owner and dog (Yes / No / Occasionally), with follow-up free text when applicable.
- Open-ended questions on problems experienced, current impact on the dog and owner, long-term impact, and total time to successful administration.
- Photo and video upload with dates.
- A 5-category ease-of-administration item: very difficult, difficult, easy, very easy, or not a problem at all.
- Contact details.

### Stage 2: survey after administering Apoquel chewable

- Demographics repeated as in Stage 1.
- Current administration method or methods for chewable tablets using the same response structure as Stage 1.
- Owner free-text description of how willingly the dog accepted the medication.
- Question on whether administering the chewable was an enjoyable experience for owner and dog (Yes / No / Occasionally), with follow-up free text when applicable.
- Open-ended questions on how administration of the chewable helped the dog and owner currently, whether the medication experience improved, why it improved if applicable, time to administration, and how the dog’s behavior made the owner feel.
- Photo and video upload with dates.
- Ease-of-administration item using the same 5-category response set as Stage 1.
- Satisfaction item: very unsatisfied, unsatisfied, neither satisfied nor unsatisfied, satisfied, very satisfied.
- Comparative item asking how much easier the chewable was to give compared with the film-coated tablet, using the same 5-category difficulty or ease response scale.
- Contact details.

## Translation and analysis

The survey was translated from English into Italian in Qualtrics and the translations were reviewed and refined by a board-certified veterinary dermatologist native to Italian and English. Owner responses were completed in Italian and translated back into English using DeepL Translate services in preparation for analysis.

The report states that qualitative data were analyzed using thematic and content analysis interchangeably. Braun and Clarke’s reflexive thematic analysis six-stage process was applied using NVivo™. Quantifiable data were downloaded from Qualtrics and analyzed descriptively, with key quantitative variables including level of ease in administration, time taken to administer the medication, and whether the administration experience was enjoyable.

# S3. Study 3: US Adherence and Outcomes Crossover

## Study identification and setting

Study 3 was titled “Client adherence and outcomes when using Apoquel tablets vs Apoquel chewable tablets” and was conducted as a multi-centered general practice study in the United States. The sponsor was Zoetis. The report states that a total of 80 dogs were planned for enrollment from 5 veterinary practices, with a minimum of 5 dogs per site and no more than 20 from any clinic. The final report states that 64 dogs were enrolled and that 60 completed the study and were included in the data analysis. The study period began in January 2024.

Study locations listed in the report were in Alabama, Connecticut, Louisiana, Coastal Florida, and Montana.

## Study design

The Study Phase was defined as Day 0 through Day 60. Dogs had been prescribed Apoquel for more than 30 days, were in a steady disease state, and were receiving one dose daily before study entry. Owners were instructed to continue to administer one treatment daily. Dogs were randomly assigned to treatment group T01 or T02.

- Group T01 received once-daily film-coated Apoquel tablets from Day 0 to Day 30 and once-daily chewable Apoquel tablets from Day 30 to Day 60.
- Group T02 received once-daily chewable Apoquel tablets from Day 0 to Day 30 and once-daily film-coated Apoquel tablets from Day 30 to Day 60.

The report explicitly states that there was no washout period between treatment groups. Tablet counts were performed at each veterinary visit to determine adherence to daily administration.

## Animals and eligibility

The report describes enrolled dogs as client-owned dogs with allergic dermatitis or allergic and atopic skin disease, in apparent good health apart from their dermatologic condition. Dogs could be of any breed or mixed breed, had to be at least 12 months of age and at least 6.6 lbs at the Day 0 visit, and could be intact or neutered. Dogs had to have received Apoquel tablets for more than 30 days, be in a steady disease state, and be expected to continue Apoquel for at least 60 days. Owners or authorized designees provided written informed consent.

The report also states that dogs were required to remain on the same diet during the study, and incidental health conditions requiring treatment were permitted only if the treatment remained unchanged during the study. If a dog presented with fleas, a dose of an isoxazoline was provided for owner administration on Day 0.

The report lists the following exclusion or withdrawal-time restrictions for concomitant medications prior to enrollment:

- Cytopoint: 3 months
- Cyclosporine: 2 weeks
- Oral steroids: 4 weeks
- Injectable steroids: 12 weeks
- Oral antibiotics: 2 weeks
- Injectable antibiotics: 4 weeks
- Antifungals: 2 weeks

Lactating bitches and dogs intended for use as breeding animals were excluded.

## Visit schedule and procedures

The report specifies the following visit schedule and procedures:

- **Day 0:** owner signed the Zoetis release form and completed the pet owner PVAS on paper; the investigator completed a concomitant medication and physical examination form and a paper VetVAS score; the dog was randomized to treatment group T01 or T02.
- **Day 30** (permitted window −3 to +1 days): owner returned with the dog and remaining medication; owner completed PVAS and the pet owner survey; investigator completed VetVAS, counted remaining tablets, dispensed tablets for Days 30–60, and scheduled the Day 60 visit.
- **Day 60** (permitted window ±3 days): owner returned with the dog and remaining medication; owner completed PVAS and the pet owner survey; investigator completed VetVAS and counted remaining tablets.

The report states that owners administered medication according to normal clinic instructions and that no additional emphasis was placed on administration guidelines. Owners were asked to bring the Apoquel bottle back to the clinic on Days 30 and 60.

## Rescue, withdrawal, and adverse events

If a dog experienced an atopic flare or perceived reduction in efficacy, the clinic was instructed to have the dog continue on the dispensed medication for an additional 3–4 days; if poor response continued, the dog was removed from the study and treated conventionally at the investigator’s discretion. Owners could request an unplanned visit if they believed the dog’s condition was deteriorating. Dogs that failed to return at Day 30 or Day 60 or required treatment outside the study protocol were withdrawn and were not included in the final statistical analysis for adherence.

The report defines an adverse event as any unfavorable and unintended observation after use of the product, whether or not considered product related. All adverse events, including human exposures, were to be documented and reported to Veterinary Medical Information and Product Support (VMIPS) within one business day of investigator knowledge.

## Outcome measures

The primary variable was treatment adherence. The report states that treatment adherence was measured by the number of dogs who missed 2 or fewer doses at the Day 30 or Day 60 assessment points; dogs missing 2 or fewer doses were considered study successes. The per-protocol dataset required evaluable PVAS assessments on Days 0, 30, and 60, medication counts on Days 0, 30, and 60, and continuation in the study through Day 60.

Secondary variables listed in the report were PVAS assessment of pruritus or allergic dermatitis, VetVAS assessment of dermatitis or inflammation, owner satisfaction responses collected on Day 30 and Day 60, owner-reported missed doses, owner-reported itch control, future formulation preference, and recommendation ratings.

## Pet owner survey instrument

The report reproduces the pet owner survey used at follow-up visits. The survey included the following items or domains:

- Current formulation used (film-coated tablets or chewable tablets).
- Open-ended description of how the owner gives the dog medication.
- Open-ended description of challenges in giving pills.
- Whether the owner hides pills in food and whether the pill given during the last 30 days had to be hidden in food.
- What foods are most commonly used to hide pills.
- How many medications the dog is currently receiving, including over-the-counter medications.
- Difficulty of giving tablets on a 1-to-10 scale, where 1 is easy and 10 is very difficult.
- Open-ended descriptions of what the experience is like for the owner and for the dog when giving tablets.
- Whether a flavored tablet is easier to give and whether the owner would prefer flavored tablets when the option is available.
- Whether any doses of medication were missed in the last 30 days and, if so, why.
- Owner perception of how well the medication controlled the dog’s itch on a 1-to-10 scale from very well controlled to not well controlled.
- Future preference for film-coated tablets or chewable tablets after using both.
- Recommendation ratings for film-coated and chewable tablets on a 1-to-5 scale from absolutely to no way.

## Pruritus and dermatitis measures

The report states that the owner PVAS was a written visual analogue scale completed on Days 0, 30, and 60 to record the severity of the dog’s pruritic activity during the previous 24 hours. Owners were instructed to read the descriptors from the bottom up, place a single horizontal cross-mark on the vertical line, and have the same individual complete the scale when possible. The investigator VetVAS was completed on paper and recorded the severity of the dog’s skin condition on a vertical scale ranging from normal dog or dermatitis not a problem to extremely severe dermatitis.

## Statistical analysis

The report states that the primary endpoint was analyzed using SAS Proc Glimmix (SAS 9.4, Cary, NC). The model included treatment, sequence, and treatment-by-sequence interaction as fixed effects, and site, animal treatment, and residual error as random effects. A binomial error distribution and logit link were used. Treatment least squares means were calculated for each group and compared with a two-sided Student’s t-test at the 5% level of significance. Secondary variables were summarized but not statistically analyzed.

# S4. Supportive social media listening for owner-voice analytics

Supportive social media listening (SML) was undertaken to provide contextual owner-voice data on the real-world challenges of administering oral medications to dogs. These analyses were not designed as a comparative clinical study of oclacitinib formulations and were included in the manuscript to contextualize administration-related experiences reported in Studies 1 to 3.

Publicly available posts were collected using the commercial social media listening platform Pulsar Platform™ from X (formerly Twitter), Reddit, Facebook, blogs, and online forums. Tailored search expressions were developed to maximize sensitivity for retrieval of posts relevant to administering oral medications to dogs, including chewable, flavored, and non-flavored products. Searches were limited to anglophone posts worldwide. American Kennel Club breed terms were used to expand retrieval beyond generic references to dogs. Retweets were excluded, and additional exclusions were added iteratively to reduce irrelevant content. Because Facebook did not support the same Boolean search structure used for X, Reddit, blogs, and forums, 32 separate Facebook searches were run in parallel.

The scraping window was 30 days. X, Reddit, blogs, and forums were scraped from 4 May to 10 June 2024. Facebook was scraped from 7 May to 6 June 2024, reflecting the platform’s limit on historic access. Preliminary raw data were manually reviewed after 24 hours and search exclusions were refined to improve yield quality. Across all Pulsar searches, approximately 27,000 raw posts were retrieved.

Data were then cleaned and pre-processed before relevance filtering. Duplicate posts were removed from X, Reddit, blogs, and forums using Python, and a large language model (LLM) was used to repeat this process for concatenated Facebook data. Titles and post text were concatenated to preserve context for downstream classification. Posts shorter than 15 words and longer than 640 words were excluded to improve the performance and efficiency of zero-shot classification. Manual spot checks were used to confirm the appropriateness of these thresholds.

Relevance filtering was performed using zero-shot classification with OpenAI’s GPT-4 model. Posts were classified as relevant, irrelevant, or ambivalent using an in-house Python workflow and prompt-based instructions. Representative samples of model output were manually checked, and posts labeled ambivalent were spot-checked to confirm that most were irrelevant, such as advertisements or promotional material. After relevance filtering, 3,629 posts from X, Reddit, blogs, and forums and 1,158 posts from Facebook were retained for analysis, giving a total relevant dataset of 4,787 posts.

Sentiment analysis and audience profiling were then undertaken using Pulsar Platform™ tools and available user metadata. Topic modelling was performed by combining non-negative matrix factorization (NNMF) with LLM-assisted interpretation. In this workflow, GPT-4o was used to identify candidate topics, generate keyword groupings, and support interpretation of the resulting topic structures. Example posts generated for each candidate theme were manually checked against the underlying data. Following this broader thematic analysis, the dataset was further probed for posts discussing specific pilling-related issues and administration practices.

For the present manuscript, a coded subset of 613 posts referencing chewable or treat-like administration was examined to estimate the prevalence of owner-voice themes related to administration context and behavior. These supportive analyses generated the theme frequencies reported in the manuscript, including themes such as interest from other household animals during dosing, child and family involvement, ingredient or protein sensitivity, training-as-reinforcer, calorie accounting, travel dosing, habit-stacking, multi-pet choreography, and puzzle or enrichment delivery.

The SML study was reviewed by the University of Surrey Ethics Committee and received favorable ethical opinion, reference FHMS 21-22/026 EGA, Amendment 3. As these data were derived from unsolicited publicly available online posts, the SML component should be interpreted as hypothesis-generating and contextual rather than as primary comparative evidence.
